# Supplementary material for: Differential proteomic analysis of virus-enriched fractions obtained from plasma pools of patients with dengue fever or severe dengue
Source: PubMed Central journal article supplement (PMC4647599; doi:10.1186/s12879-015-1271-7), 2015-11-14
Supplement: 12879_2015_1271_MOESM1_ESM.pdf [file 12879_2015_1271_MOESM1_ESM.pdf]

| Accession number | Protein name                                                    | Average DF peptide | Average SD peptide | RatioSD/DF peptide |
|------------------|-----------------------------------------------------------------|--------------------|--------------------|--------------------|
| P09871           | Complement C1s subcomponent (C1 esterase)                       | 3,5                | 14,5               | 4,14               |
| P07225           | Vitamin K-dependent protein S                                   | 1                  | 4                  | 4,00               |
| P01008           | Antithrombin-III (ATIII) (Serpin C1)                            | 3                  | 9,5                | 3,17               |
| Q16610           | Extracellular matrix protein 1 (Secretory component p85)        | 1                  | 3                  | 3,00               |
| P27918           | Properdin (Complement factor P)                                 | 1,5                | 4                  | 2,67               |
| B4E1B2           | Serotransferrin                                                 | 11                 | 29                 | 2,64               |
| Q53H26           | Transferrin variant (Fragment)                                  | 11                 | 29                 | 2,64               |
| B4DPQ0           | Complement C1r subcomponent                                     | 5                  | 13                 | 2,60               |
| P01019           | Angiotensinogen (Serpin A8)                                     | 1                  | 2,5                | 2,50               |
| B4DDU2           | Tubulin alpha-ubiquitous chain                                  | 2,5                | 6                  | 2,40               |
| P01779           | Ig heavy chain V-III region TUR                                 | 2,5                | 6                  | 2,40               |
| P68366           | Tubulin alpha-4A chain (Alpha-tubulin 1)                        | 3                  | 6,5                | 2,17               |
| P00734           | Prothrombin (Coagulation factor II)                             | 2                  | 4                  | 2,00               |
| P21333           | Filamin-A (Actin-binding protein 280)                           | 14,5               | 28,5               | 1,97               |
| P00450           | Ceruloplasmin (EC 1.16.3.1) (Ferroxidase)                       | 8,5                | 16,5               | 1,94               |
| E7EX29           | 14-3-3 protein zeta/delta (Fragment)                            | 4,5                | 8,5                | 1,89               |
| P63104           | 14-3-3 protein zeta/delta (KCIP-1)                              | 4,5                | 8,5                | 1,89               |
| B4E1D8           | cDNA FLJ51597, highly similar to C4b-binding protein            | 10,5               | 19                 | 1,81               |
| P18206           | Vinculin (Metavinculin)                                         | 5                  | 9                  | 1,80               |
| P12814           | Alpha-actinin-1 (Alpha-actinin cytoskeletal isoform)            | 6,5                | 11,5               | 1,77               |
| O43707           | Alpha-actinin-4 (F-actin cross-linking protein)                 | 6,5                | 11,5               | 1,77               |
| P06396           | Gelsolin (AGEL) (Actin-depolymerizing factor)                   | 3,5                | 6                  | 1,71               |
| P05106           | Integrin beta-3 (Platelet membrane glycoprotein IIIa) (GPIIIa)  | 5,5                | 9                  | 1,64               |
| P08514           | Integrin alpha-IIb (GPIIb) (Platelet membrane glycoprotein IIb) | 12,5               | 20                 | 1,60               |
| P01833           | Polymeric immunoglobulin receptor (PIgR)                        | 2,5                | 4                  | 1,60               |
| Q9Y490           | Talin-1                                                         | 28,5               | 43                 | 1,51               |
| A2J1N9           | Rheumatoid factor RF-ET12 (Fragment)                            | 3                  | 4,5                | 1,50               |
| Q5NV90           | V2-17 protein (Fragment)                                        | 3                  | 4,5                | 1,50               |
| P01023           | Alpha-2-macroglobulin (Alpha-2-M)                               | 56,5               | 83                 | 1,47               |
| A2KBC6           | Anti-FactorVIII scFv (Fragment)                                 | 6,5                | 9,5                | 1,46               |

|        |                                                                   |      |      |      |
|--------|-------------------------------------------------------------------|------|------|------|
| P01011 | Alpha-1-antichymotrypsin (ACT) (Serp1n A3)                        | 3,5  | 5    | 1,43 |
| P00738 | Haptoglobin                                                       | 13,5 | 19   | 1,41 |
| P02743 | Serum amyloid P-component (SAP)                                   | 2,5  | 3,5  | 1,40 |
| P01024 | C3 and PZP-like alpha-2-macroglobulin domain-containing protein 1 | 60,5 | 84,5 | 1,40 |
| A8K008 | cDNA FLJ78387                                                     | 17,5 | 24   | 1,37 |
| A2IPI5 | HRV Fab 026-VL (Fragment)                                         | 3    | 4    | 1,33 |
| Q6UX06 | Olfactomedin-4 (OLM4) (Antiapoptotic protein GW112)               | 4,5  | 6    | 1,33 |
| P03952 | Plasma kallikrein (EC 3.4.21.34) (Fletcher factor)                | 1,5  | 2    | 1,33 |
| P08567 | Pleckstrin (Platelet 47 kDa protein) (p47)                        | 1,5  | 2    | 1,33 |
| P07996 | Thrombospondin-1                                                  | 19,5 | 26   | 1,33 |
| P07437 | Tubulin beta chain (Tubulin beta-5 chain)                         | 4,5  | 6    | 1,33 |
| A2MYD4 | V2-7 protein (Fragment)                                           | 3    | 4    | 1,33 |
| P00488 | Coagulation factor XIII A chain (EC 2.3.2.13)                     | 3,5  | 4,5  | 1,29 |
| Q71U36 | Tubulin alpha-1A chain (Alpha-tubulin 3)                          | 3,5  | 4,5  | 1,29 |
| P68363 | Tubulin alpha-1B chain (Alpha-tubulin ubiquitous)                 | 3,5  | 4,5  | 1,29 |
| Q9BQE3 | Tubulin alpha-1C chain (Alpha-tubulin 6)                          | 3,5  | 4,5  | 1,29 |
| Q9H4B7 | Tubulin beta-1 chain                                              | 3,5  | 4,5  | 1,29 |
| Q96K68 | cDNA FLJ14473 fis, clone MAMMA1001080                             | 12   | 15   | 1,25 |
| P08107 | Heat shock 70 kDa protein 1A/1B                                   | 2    | 2,5  | 1,25 |
| P34931 | Heat shock 70 kDa protein 1-like                                  | 2    | 2,5  | 1,25 |
| P11142 | Heat shock cognate 71 kDa protein                                 | 2    | 2,5  | 1,25 |
| Q6N089 | Putative uncharacterized protein DKFZp686P15220                   | 15   | 18,5 | 1,23 |
| P02675 | Fibrinogen beta chain                                             | 11   | 13,5 | 1,23 |
| P00739 | Haptoglobin-related protein                                       | 12   | 14,5 | 1,21 |
| Q86UX7 | Fermitin family homolog 3 (Kindlin-3)                             | 5    | 6    | 1,20 |
| P02751 | Fibronectin (FN)                                                  | 61,5 | 72,5 | 1,18 |
| B7ZLE5 | FN1 protein                                                       | 61,5 | 72,5 | 1,18 |
| Q6MZM7 | Putative uncharacterized protein DKFZp686O12165                   | 61,5 | 72,5 | 1,18 |
| Q68CX6 | Putative uncharacterized protein DKFZp686O13149                   | 61,5 | 72,5 | 1,18 |
| P68032 | Actin, alpha cardiac muscle 1 (Alpha-cardiac actin)               | 8,5  | 10   | 1,18 |
| Q562R1 | Beta-actin-like protein 2 (Kappa-actin)                           | 8,5  | 10   | 1,18 |
| P0C0L4 | Complement C4-A (Acidic complement C4)                            | 52   | 61   | 1,17 |
| P0C0L5 | Complement C4-B (Basic complement C4)                             | 52   | 61   | 1,17 |
| B0UZ85 | Complement component 4B (Childo blood group)                      | 53   | 62   | 1,17 |

|        |                                                                 |      |      |      |
|--------|-----------------------------------------------------------------|------|------|------|
| Q6MZQ6 | Putative uncharacterized protein DKFZp686G11190                 | 15   | 17,5 | 1,17 |
| P07477 | Trypsin-1 (EC 3.4.21.4) (Serine protease 1)                     | 3    | 3,5  | 1,17 |
| Q4TZM4 | Hemoglobin beta chain (Fragment)                                | 6,5  | 7,5  | 1,15 |
| P04004 | Vitronectin (VN) (S-protein) (V75)                              | 6,5  | 7,5  | 1,15 |
| B2RUT6 | Complement component 4A (Rodgers blood group)                   | 53,5 | 61,5 | 1,15 |
| P01031 | Complement C5                                                   | 3,5  | 4    | 1,14 |
| Q9UL78 | Myosin-reactive immunoglobulin light chain variable region      | 3,5  | 4    | 1,14 |
| Q5NV62 | V3-4 protein (Fragment)                                         | 6    | 7    | 1,17 |
| A6H8M8 | C4A protein (Complement C4 gamma chain)                         | 53,5 | 61   | 1,14 |
| P02768 | Serum albumin                                                   | 51,5 | 58,5 | 1,14 |
| Q7Z351 | Putative uncharacterized protein DKFZp686N02209                 | 15   | 17   | 1,13 |
| P02649 | Apolipoprotein E (Apo-E)                                        | 4    | 4,5  | 1,13 |
| P01009 | Alpha-1-antitrypsin (Alpha-1 protease inhibitor) (Serp1n A1)    | 8,5  | 9,5  | 1,12 |
| Q08380 | Galectin-3-binding protein (Basement membrane autoantigen p105) | 12   | 13   | 1,08 |
| Q6N092 | Putative uncharacterized protein DKFZp686K18196 (Fragment)      | 12   | 13   | 1,08 |
| P63261 | Actin, cytoplasmic 2 (Gamma-actin)                              | 20   | 21,5 | 1,08 |
| P02671 | Fibrinogen alpha chain                                          | 9,5  | 10   | 1,05 |
| P60709 | Actin, cytoplasmic 1 (Beta-actin)                               | 19,5 | 20,5 | 1,05 |
| A2MYE1 | A30 (Fragment)                                                  | 4    | 4    | 1,00 |
| Q96SA9 | Anti-streptococcal/anti-myosin immunoglobulin kappa light chain | 3,5  | 3,5  | 1,00 |
| P06576 | ATP synthase subunit beta, mitochondrial (EC 3.6.3.14)          | 2    | 2    | 1,00 |
| O43866 | CD5 antigen-like (CT-2) (IgM-associated peptide)                | 15   | 15   | 1,00 |
| P12259 | Coagulation factor V (Activated protein C cofactor)             | 1,5  | 1,5  | 1,00 |
| P02747 | Complement C1q subcomponent subunit C                           | 5,5  | 5,5  | 1,00 |
| P04196 | Histidine-rich glycoprotein (HPRG)                              | 1,5  | 1,5  | 1,00 |
| P01892 | HLA class I , A-2 alpha chain (MHC class I antigen A*2)         | 3    | 3    | 1,00 |
| P30447 | HLA class I histocompatibility antigen, A-23 alpha chain        | 3    | 3    | 1,00 |
| F6IQP2 | MHC class I antigen (Fragment)                                  | 3    | 3    | 1,00 |
| F6IR35 | MHC class I antigen (Fragment)                                  | 3    | 3    | 1,00 |
| A2NKM7 | NANUC-2 heavy chain (Fragment)                                  | 3    | 3    | 1,00 |
| P26022 | Pentraxin-related protein PTX3 (Pentaxin-related protein PTX3)  | 2    | 2    | 1,00 |
| P02760 | Protein AMBP                                                    | 2,5  | 2,5  | 1,00 |
| A2J1M8 | Rheumatoid factor RF-IP12 (Rheumatoid factor RF-IP13)           | 3    | 3    | 1,00 |
| A2J1N0 | Rheumatoid factor RF-IP14 (Fragment)                            | 6    | 6    | 1,00 |

|        |                                                                        |      |      |      |
|--------|------------------------------------------------------------------------|------|------|------|
| Q9HCC1 | Single chain Fv (Fragment)                                             | 7,5  | 7,5  | 1,00 |
| H0YLA9 | Uncharacterized protein                                                | 2    | 2    | 1,00 |
| P02774 | Vitamin D-binding protein (DBP) (VDB)                                  | 2    | 2    | 1,00 |
| P02647 | Apolipoprotein A-I (ApoA-I) (Apolipoprotein A1)                        | 11   | 10,5 | 0,95 |
| P68871 | Hemoglobin subunit beta (Beta-globin)                                  | 8,5  | 8    | 0,94 |
| A2NYQ9 | Anti-folate binding protein (Fragment)                                 | 7    | 6,5  | 0,93 |
| A2JA14 | Anti-mucin1 heavy chain variable region (Fragment)                     | 6,5  | 6    | 0,92 |
| B6EDE2 | Epididymis luminal protein 180 (Fragment)                              | 6,5  | 6    | 0,92 |
| Q14477 | Hbbm fused globin protein (Fragment)                                   | 6,5  | 6    | 0,92 |
| Q670S4 | Hemoglobin Lepore-Baltimore (Fragment)                                 | 6,5  | 6    | 0,92 |
| P02042 | Hemoglobin subunit delta (Delta-globin)                                | 6,5  | 6    | 0,92 |
| Q9UL90 | Myosin-reactive immunoglobulin heavy chain variable region             | 6,5  | 6    | 0,92 |
| A2NZ55 | Variable immunoglobulin anti-estradiol heavy chain                     | 6,5  | 6    | 0,92 |
| Q15485 | Ficolin-2 (37 kDa elastin-binding protein)                             | 5,5  | 5    | 0,91 |
| Q9UL88 | Myosin-reactive immunoglobulin heavy chain variable region             | 5    | 4,5  | 0,90 |
| Q6ZVX0 | cDNA FLJ41981 fis, clone SMINT2011888                                  | 9,5  | 8,5  | 0,89 |
| Q7Z374 | Putative uncharacterized protein DKFZp686C02218                        | 9,5  | 8,5  | 0,89 |
| Q6MZX9 | Putative uncharacterized protein DKFZp686M08189                        | 9,5  | 8,5  | 0,89 |
| P02679 | Fibrinogen gamma chain                                                 | 12,5 | 11   | 0,88 |
| Q6P5S8 | antioxidant activity; very-low-density lipoprotein particle remodeling | 16   | 14   | 0,88 |
| P27105 | Erythrocyte band 7 integral membrane protein (Stomatin)                | 4    | 3,5  | 0,88 |
| P69905 | Hemoglobin subunit alpha (Alpha-globin)                                | 4    | 3,5  | 0,88 |
| Q6GMX0 | Putative uncharacterized protein                                       | 16   | 14   | 0,88 |
| P02792 | Ferritin light chain (Ferritin L subunit)                              | 3,5  | 3    | 0,86 |
| Q9UL71 | Myosin-reactive immunoglobulin heavy chain variable region             | 7    | 6    | 0,86 |
| Q07954 | Prolow-density lipoprotein receptor-related protein 1 (LRP-1)          | 7    | 6    | 0,86 |
| A1A508 | PRSS3 protein                                                          | 3,5  | 3    | 0,86 |
| Q6P5S3 | Putative uncharacterized protein                                       | 7    | 6    | 0,86 |
| Q65ZC9 | Single-chain Fv (Fragment)                                             | 7    | 6    | 0,86 |
| Q5CZ94 | Putative uncharacterized protein DKFZp781M0386                         | 6,5  | 5,5  | 0,85 |
| P19823 | Inter-alpha-trypsin inhibitor heavy chain H2 (ITI-HC2)                 | 9,5  | 8    | 0,84 |
| Q16195 | Keratin (Fragment)                                                     | 9,5  | 8    | 0,84 |
| P30464 | HLA class I , B-15 alpha chain (MHC class I antigen B*15)              | 3    | 2,5  | 0,83 |
| P03989 | HLA class I , B-27 alpha chain (MHC class I antigen B*27)              | 3    | 2,5  | 0,83 |

|        |                                                             |      |      |      |
|--------|-------------------------------------------------------------|------|------|------|
| Q9UL83 | Myosin-reactive immunoglobulin light chain variable region  | 3    | 2,5  | 0,83 |
| P35579 | Myosin-9 (Myosin heavy chain 9)                             | 8,5  | 7    | 0,82 |
| A0A5E4 | Putative uncharacterized protein                            | 8,5  | 7    | 0,82 |
| P10909 | Clusterin (Apolipoprotein J) (Apo-J)                        | 5,5  | 4,5  | 0,82 |
| Q5EFE6 | Anti-RhD monoclonal T125 kappa light chain                  | 16   | 13   | 0,81 |
| Q86TT1 | Full-length cDNA clone CS0DD006YL02 of Neuroblastoma        | 28   | 22,5 | 0,80 |
| O14791 | Apolipoprotein L1 (ApoL-I)                                  | 2,5  | 2    | 0,80 |
| A2NB45 | Cold agglutinin FS-1 L-chain (Fragment)                     | 2,5  | 2    | 0,80 |
| A2NB44 | Cold agglutinin FS-2 H-chain (Fragment)                     | 2,5  | 2    | 0,80 |
| B1N7B8 | Cryocryoglobulin CC1 kappa light chain variable region      | 2,5  | 2    | 0,80 |
| Q86SX2 | Full-length cDNA clone CS0DL004YM19 of B cells              | 2,5  | 2    | 0,80 |
| Q7Z3Y6 | Rearranged VH4-34 V gene segment (Fragment)                 | 2,5  | 2    | 0,80 |
| A0N5G5 | Rheumatoid factor D5 light chain (Fragment)                 | 2,5  | 2    | 0,80 |
| H0YK52 | Uncharacterized protein                                     | 2,5  | 2    | 0,80 |
| Q14624 | Inter-alpha-trypsin inhibitor heavy chain H4 (ITI-HC4)      | 16   | 12,5 | 0,78 |
| P31946 | 14-3-3 protein beta/alpha (KCIP-1)                          | 4,5  | 3,5  | 0,78 |
| P62258 | 14-3-3 protein epsilon (14-3-3E)                            | 4,5  | 3,5  | 0,78 |
| Q04917 | 14-3-3 protein eta (Protein AS1)                            | 4,5  | 3,5  | 0,78 |
| P61981 | 14-3-3 protein gamma (KCIP-1)                               | 4,5  | 3,5  | 0,78 |
| P27348 | 14-3-3 protein theta (Protein HS1)                          | 4,5  | 3,5  | 0,78 |
| A2NUT2 | Lambda-chain (AA -20 to 215)                                | 9    | 7    | 0,78 |
| P02776 | Platelet factor 4 (PF-4)                                    | 4    | 3    | 0,75 |
| P10720 | Platelet factor 4 variant (CXCL4L1)                         | 4    | 3    | 0,75 |
| P02746 | Complement C1q subcomponent subunit B                       | 9,5  | 7    | 0,74 |
| P48740 | Mannan-binding lectin serine protease 1 (EC 3.4.21.-)       | 7,5  | 5,5  | 0,73 |
| Q96JD0 | Amyloid lambda 6 light chain variable region SAR (Fragment) | 9    | 6,5  | 0,72 |
| Q6GMV8 | Putative uncharacterized protein                            | 9    | 6,5  | 0,72 |
| Q8NEJ1 | Putative uncharacterized protein                            | 9    | 6,5  | 0,72 |
| A0N5G3 | Rheumatoid factor G9 light chain (Fragment)                 | 9    | 6,5  | 0,72 |
| P02745 | Complement C1q subcomponent subunit A                       | 3,5  | 2,5  | 0,71 |
| P60660 | Myosin light polypeptide 6 (MLC-3)                          | 3,5  | 2,5  | 0,71 |
| Q6MZU6 | Putative uncharacterized protein DKFZp686C15213             | 17,5 | 12,5 | 0,71 |
| Q6N093 | Putative uncharacterized protein DKFZp686I04196 (Fragment)  | 17,5 | 12,5 | 0,71 |
| P61224 | Ras-related protein Rap-1b (GTP-binding protein smg p21B)   | 3    | 2    | 0,67 |

|        |                                                                     |      |      |      |
|--------|---------------------------------------------------------------------|------|------|------|
| P19105 | Myosin regulatory light chain 12A (MLC-2B)                          | 4    | 2,5  | 0,63 |
| P05387 | 60S acidic ribosomal protein P2 (Renal carcinoma antigen NY-REN-44) | 2,5  | 1,5  | 0,60 |
| P19338 | Nucleolin (Protein C23)                                             | 10   | 6    | 0,60 |
| O75636 | Ficolin-3 (Collagen/fibrinogen domain-containing lectin 3 p35)      | 3,5  | 2    | 0,57 |
| F8VWA4 | Uncharacterized protein                                             | 3,5  | 2    | 0,57 |
| B7Z539 | cDNA FLJ56954                                                       | 8    | 4,5  | 0,56 |
| Q96CX2 | BTB/POZ domain-containing protein KCTD12 (Pfetin)                   | 4,5  | 2,5  | 0,56 |
| P02730 | Band 3 anion transport protein(AE 1)                                | 17,5 | 9,5  | 0,54 |
| P23528 | Cofilin-1 (p18)                                                     | 3    | 1,5  | 0,50 |
| P06748 | Nucleophosmin (NPM)                                                 | 3    | 1,5  | 0,50 |
| Q6N091 | Putative uncharacterized protein DKFZp686C02220                     | 7    | 3,5  | 0,50 |
| Q6N041 | Putative uncharacterized protein DKFZp686O16217 (Fragment)          | 7    | 3,5  | 0,50 |
| P11166 | Solute carrier family 2, facilitated glucose transporter member 1   | 2    | 1    | 0,50 |
| P04275 | von Willebrand antigen 2                                            | 61,5 | 28,5 | 0,46 |
| P62805 | Histone H4                                                          | 2,5  | 1    | 0,40 |
| Q13201 | Multimerin-1 (EMILIN-4)                                             | 11   | 4    | 0,36 |
| B7Z1F8 | cDNA FLJ53025, highly similar to Complement C4-B                    | 52   | 16   | 0,31 |
| P04114 | Apolipoprotein B-100 (Apo B-100)                                    | 25   | 7,5  | 0,30 |
| Q8TCG3 | TPMsk3 (Fragment)                                                   | 5    | 1,5  | 0,30 |
| P16452 | Erythrocyte membrane protein band 4.2 (P4.2)                        | 5,5  | 1    | 0,18 |
| P11277 | Spectrin beta chain, erythrocyte (Beta-I spectrin)                  | 23   | 3    | 0,13 |
| P02549 | Spectrin alpha chain, erythrocyte (Erythroid alpha-spectrin)        | 33   | 1,5  | 0,05 |

| Accession number | protein name                                                      | SD Average Peptides (no DF peptides) |
|------------------|-------------------------------------------------------------------|--------------------------------------|
| P00751           | Complement factor B (C3/C5 convertase)                            | 4.5                                  |
| P00752           | Complement component C8 alpha chain                               | 2                                    |
| P00753           | Peroxiredoxin-1 (Natural killer cell-enhancing factor A) (NKEF-A) | 2                                    |
| P00754           | Moesin (Membrane-organizing extension spike protein)              | 2                                    |
| P00755           | Chloride intracellular channel protein 1 (Chloride channel ABP)   | 2                                    |
| P00756           | Ferritin heavy chain (Ferritin H subunit)                         | 2                                    |
